# Supplementary material for: Learning the Language of Social Media: A Comparison of Engagement Metrics and Social Media Strategies Used by Food and Nutrition-Related Social Media Accounts
Source: Nutrients. 2020 Sep 16;12(9):2839. doi: 10.3390/nu12092839 (PMC7551727; doi:10.3390/nu12092839)
Supplement: Supplementary file 1 [file nutrients-12-02839-s001.xlsx]

## Sheet: Total
		Food displayed
		No			Yes
		Count	Row Total N %	Column Total N %	Count	Row Total N %	Column Total N %
Season	Summer	181	0.477573	0.526163	198	0.522427	0.505102
	Winter	163	0.456583	0.473837	194	0.543417	0.494898
Social media platform	Facebook	220	0.511628	0.639535	210	0.488372	0.535714
	Instagram	124	0.405229	0.360465	182	0.594771	0.464286
Format	Photo, photo with text, shared photo	237	0.501057	0.688953	236	0.498943	0.602041
	Video, video with text, shared video	58	0.313514	0.168605	127	0.686486	0.32398
	Text only	49	0.628205	0.142442	29	0.371795	0.0739796
Origin of post	Original	282	0.450479	0.819767	344	0.549521	0.877551
	Shared	62	0.563636	0.180233	48	0.436364	0.122449
Hashtags	No	198	0.437086	0.575581	255	0.562914	0.65051
	Yes	146	0.515901	0.424419	137	0.484099	0.34949
Links to other social media channels	No	108	0.328267	0.313953	221	0.671733	0.563776
	Yes	236	0.579853	0.686047	171	0.420147	0.436224
Links to health information	No	308	0.44898	0.895349	378	0.55102	0.964286
	Yes	36	0.72	0.104651	14	0.28	0.0357143
Product promotion	No	246	0.520085	0.715116	227	0.479915	0.579082
	Yes	98	0.372624	0.284884	165	0.627376	0.420918
Does the content of the post promote health	No	132	0.368715	0.383721	226	0.631285	0.576531
	Yes	212	0.560847	0.616279	166	0.439153	0.423469
Prompting engagement	N/A	130	0.45614	0.377907	155	0.54386	0.395408
	Announcement	105	0.470852	0.305233	118	0.529148	0.30102
	Requires a response	74	0.435294	0.215116	96	0.564706	0.244898
	Requires an action	35	0.625	0.101744	21	0.375	0.0535714
Relationship building	N/A	124	0.338798	0.360465	242	0.661202	0.617347
	External content	117	0.609375	0.340116	75	0.390625	0.191327
	Replies to audience	73	0.593496	0.212209	50	0.406504	0.127551
	Competition	6	0.285714	0.0174419	15	0.714286	0.0382653
	Event photo	24	0.75	0.0697674	8	0.25	0.0204082
Real-world-tie-ins	N/A	196	0.443439	0.569767	246	0.556561	0.627551
	Yes	148	0.505119	0.430233	145	0.494881	0.369898
Encouragement to eat	N/A	309	0.953704	0.898256	15	0.0462963	0.0382653
	Encouragement to eat, general	29	0.114625	0.0843023	224	0.885375	0.571429
	Encouragement to eat, specific	6	0.115385	0.0174419	46	0.884615	0.117347
	Food shown	0	0	0	107	1	0.272959
Encouragement to exercise	No	236	0.380032	0.686047	385	0.619968	0.982143
	Yes	108	0.93913	0.313953	7	0.0608696	0.0178571
Emotion Inducing	Positive	271	0.434295	0.787791	353	0.565705	0.90051
	Negative	33	0.673469	0.0959302	16	0.326531	0.0408163
Association with success	No	267	0.420472	0.776163	368	0.579528	0.938776
	Yes	77	0.762376	0.223837	24	0.237624	0.0612245
Tone	-9.00 (missing)	0	0	0	1	1	0.00255102
	Positive	251	0.456364	0.729651	299	0.543636	0.762755
	Neutral	85	0.485714	0.247093	90	0.514286	0.229592
	Negative	8	0.8	0.0232558	2	0.2	0.00510204
Social Media Strategy Used	Visually appealing	65	0.26971	0.188953	176	0.73029	0.44898
	Statistics/facts	51	0.689189	0.148256	23	0.310811	0.0586735
	Relates to a product	28	0.243478	0.0813953	87	0.756522	0.221939
	Relatable content	184	0.681481	0.534884	86	0.318519	0.219388
	Humourous	16	0.444444	0.0465116	20	0.555556	0.0510204

## Sheet: Core vs Noncore
		Core vs NonCore Foods
		Core			NonCore
		Count	Row Total N %	Column Total N %	Count	Row Total N %	Column Total N %
Season	Summer	84	0.424242	0.497041	114	0.575758	0.511211
	Winter	85	0.438144	0.502959	109	0.561856	0.488789
Social media platform	Facebook	84	0.4	0.497041	126	0.6	0.565022
	Instagram	85	0.467033	0.502959	97	0.532967	0.434978
Format	Photo, photo with text, shared photo	111	0.470339	0.656805	125	0.529661	0.560538
	Video, video with text, shared video	36	0.283465	0.213018	91	0.716535	0.408072
	Text only	22	0.758621	0.130178	7	0.241379	0.0313901
Origin of post	Original	142	0.412791	0.840237	202	0.587209	0.90583
	Shared	27	0.5625	0.159763	21	0.4375	0.0941704
Hashtags	No	100	0.392157	0.591716	155	0.607843	0.695067
	Yes	69	0.50365	0.408284	68	0.49635	0.304933
Links to other social media channels	No	75	0.339367	0.443787	146	0.660633	0.654709
	Yes	94	0.549708	0.556213	77	0.450292	0.345291
Links to health information	No	158	0.417989	0.934911	220	0.582011	0.986547
	Yes	11	0.785714	0.0650888	3	0.214286	0.0134529
Product promotion	No	137	0.603524	0.810651	90	0.396476	0.403587
	Yes	32	0.193939	0.189349	133	0.806061	0.596413
Does the content of the post promote health	No	11	0.0486726	0.0650888	215	0.951327	0.964126
	Yes	158	0.951807	0.934911	8	0.0481928	0.0358744
Prompting engagement	N/A	74	0.477419	0.43787	81	0.522581	0.363229
	Announcement	44	0.372881	0.260355	74	0.627119	0.331839
	Requires a response	46	0.479167	0.272189	50	0.520833	0.224215
	Requires an action	5	0.238095	0.0295858	16	0.761905	0.0717489
Relationship building	N/A	94	0.38843	0.556213	148	0.61157	0.663677
	External content	35	0.466667	0.207101	40	0.533333	0.179372
	Replies to audience	28	0.56	0.16568	22	0.44	0.0986547
	Competition	5	0.333333	0.0295858	10	0.666667	0.044843
	Event photo	7	0.875	0.0414201	1	0.125	0.0044843
Real-world-tie-ins	N/A	101	0.410569	0.597633	145	0.589431	0.650224
	Yes	68	0.468966	0.402367	77	0.531034	0.345291
Encouragement to eat	N/A	5	0.333333	0.0295858	10	0.666667	0.044843
	Encouragement to eat, general	109	0.486607	0.64497	115	0.513393	0.515695
	Encouragement to eat, specific	12	0.26087	0.0710059	34	0.73913	0.152466
	Food shown	43	0.401869	0.254438	64	0.598131	0.286996
Encouragement to exercise	No	163	0.423377	0.964497	222	0.576623	0.995516
	Yes	6	0.857143	0.035503	1	0.142857	0.0044843
Emotion Inducing	Positive	148	0.419263	0.87574	205	0.580737	0.919283
	Negative	9	0.5625	0.0532544	7	0.4375	0.0313901
Association with success	No	147	0.399457	0.869822	221	0.600543	0.991031
	Yes	22	0.916667	0.130178	2	0.0833333	0.00896861
Tone	-9.00 (missing)	0	0	0	1	1	0.0044843
	Positive	97	0.324415	0.573964	202	0.675585	0.90583
	Neutral	71	0.788889	0.420118	19	0.211111	0.0852018
	Negative	1	0.5	0.00591716	1	0.5	0.0044843
Social Media Strategy Used	Visually appealing	77	0.4375	0.455621	99	0.5625	0.443946
	Statistics/facts	18	0.782609	0.106509	5	0.217391	0.0224215
	Relates to a product	16	0.183908	0.0946746	71	0.816092	0.318386
	Relatable content	57	0.662791	0.337278	29	0.337209	0.130045
	Humourous	1	0.05	0.00591716	19	0.95	0.0852018

## Sheet: Platform
		Social media platform
		Facebook						Instagram
		Core vs NonCore Foods						Core vs NonCore Foods
		Core			NonCore			Core			NonCore
		Count	Row Total N %	Column Total N %	Count	Row Total N %	Column Total N %	Count	Row Total N %	Column Total N %	Count	Row Total N %	Column Total N %
Season	Summer	37	0.349057	0.440476	69	0.650943	0.547619	47	0.51087	0.552941	45	0.48913	0.463918
	Winter	47	0.451923	0.559524	57	0.548077	0.452381	38	0.422222	0.447059	52	0.577778	0.536082
Format	Photo, photo with text, shared photo	40	0.40404	0.47619	59	0.59596	0.468254	71	0.518248	0.835294	66	0.481752	0.680412
	Video, video with text, shared video	22	0.268293	0.261905	60	0.731707	0.47619	14	0.311111	0.164706	31	0.688889	0.319588
	Text only	22	0.758621	0.261905	7	0.241379	0.0555556	0	0	0	0	0	0
Origin of post	Original	73	0.374359	0.869048	122	0.625641	0.968254	69	0.463087	0.811765	80	0.536913	0.824742
	Shared	11	0.733333	0.130952	4	0.266667	0.031746	16	0.484848	0.188235	17	0.515152	0.175258
Hashtags	No	60	0.348837	0.714286	112	0.651163	0.888889	40	0.481928	0.470588	43	0.518072	0.443299
	Yes	24	0.631579	0.285714	14	0.368421	0.111111	45	0.454545	0.529412	54	0.545455	0.556701
Links to other social media channels	No	25	0.238095	0.297619	80	0.761905	0.634921	50	0.431034	0.588235	66	0.568966	0.680412
	Yes	59	0.561905	0.702381	46	0.438095	0.365079	35	0.530303	0.411765	31	0.469697	0.319588
Links to health information	No	73	0.372449	0.869048	123	0.627551	0.97619	85	0.467033	1	97	0.532967	1
	Yes	11	0.785714	0.130952	3	0.214286	0.0238095	0	0	0	0	0	0
Product promotion	No	65	0.619048	0.77381	40	0.380952	0.31746	72	0.590164	0.847059	50	0.409836	0.515464
	Yes	19	0.180952	0.22619	86	0.819048	0.68254	13	0.216667	0.152941	47	0.783333	0.484536
Does the content of the post promote health	No	4	0.032	0.047619	121	0.968	0.960317	7	0.0693069	0.0823529	94	0.930693	0.969072
	Yes	80	0.941176	0.952381	5	0.0588235	0.0396825	78	0.962963	0.917647	3	0.037037	0.0309278
Prompting engagement	N/A	40	0.487805	0.47619	42	0.512195	0.333333	34	0.465753	0.4	39	0.534247	0.402062
	Announcement	19	0.292308	0.22619	46	0.707692	0.365079	25	0.471698	0.294118	28	0.528302	0.28866
	Requires a response	20	0.425532	0.238095	27	0.574468	0.214286	26	0.530612	0.305882	23	0.469388	0.237113
	Requires an action	5	0.357143	0.0595238	9	0.642857	0.0714286	0	0	0	7	1	0.0721649
Relationship building	N/A	48	0.350365	0.571429	89	0.649635	0.706349	46	0.438095	0.541176	59	0.561905	0.608247
	External content	17	0.5	0.202381	17	0.5	0.134921	18	0.439024	0.211765	23	0.560976	0.237113
	Replies to audience	13	0.541667	0.154762	11	0.458333	0.0873016	15	0.576923	0.176471	11	0.423077	0.113402
	Competition	3	0.3	0.0357143	7	0.7	0.0555556	2	0.4	0.0235294	3	0.6	0.0309278
	Event photo	3	1	0.0357143	0	0	0	4	0.8	0.0470588	1	0.2	0.0103093
Real-world-tie-ins	N/A	53	0.389706	0.630952	83	0.610294	0.65873	48	0.436364	0.564706	62	0.563636	0.639175
	Yes	31	0.424658	0.369048	42	0.575342	0.333333	37	0.513889	0.435294	35	0.486111	0.360825
Encouragement to eat	N/A	3	0.272727	0.0357143	8	0.727273	0.0634921	2	0.5	0.0235294	2	0.5	0.0206186
	Encouragement to eat, general	54	0.446281	0.642857	67	0.553719	0.531746	55	0.533981	0.647059	48	0.466019	0.494845
	Encouragement to eat, specific	4	0.181818	0.047619	18	0.818182	0.142857	8	0.333333	0.0941176	16	0.666667	0.164948
	Food shown	23	0.410714	0.27381	33	0.589286	0.261905	20	0.392157	0.235294	31	0.607843	0.319588
Encouragement to exercise	No	80	0.38835	0.952381	126	0.61165	1	83	0.463687	0.976471	96	0.536313	0.989691
	Yes	4	1	0.047619	0	0	0	2	0.666667	0.0235294	1	0.333333	0.0103093
Emotion Inducing	Positive	71	0.39011	0.845238	111	0.60989	0.880952	77	0.450292	0.905882	94	0.549708	0.969072
	Negative	7	0.5	0.0833333	7	0.5	0.0555556	2	1	0.0235294	0	0	0
Association with success	No	74	0.371859	0.880952	125	0.628141	0.992063	73	0.431953	0.858824	96	0.568047	0.989691
	Yes	10	0.909091	0.119048	1	0.0909091	0.00793651	12	0.923077	0.141176	1	0.0769231	0.0103093
Tone	-9.00 (missing)	0	0	0	1	1	0.00793651	0	0	0	0	0	0
	Positive	37	0.246667	0.440476	113	0.753333	0.896825	60	0.402685	0.705882	89	0.597315	0.917526
	Neutral	47	0.810345	0.559524	11	0.189655	0.0873016	24	0.75	0.282353	8	0.25	0.0824742
	Negative	0	0	0	1	1	0.00793651	1	1	0.0117647	0	0	0
Social Media Strategy Used	Visually appealing	28	0.368421	0.333333	48	0.631579	0.380952	49	0.49	0.576471	51	0.51	0.525773
	Statistics/facts	12	0.75	0.142857	4	0.25	0.031746	6	0.857143	0.0705882	1	0.142857	0.0103093
	Relates to a product	12	0.20339	0.142857	47	0.79661	0.373016	4	0.142857	0.0470588	24	0.857143	0.247423
	Relatable content	31	0.659574	0.369048	16	0.340426	0.126984	26	0.666667	0.305882	13	0.333333	0.134021
	Humourous	1	0.0833333	0.0119048	11	0.916667	0.0873016	0	0	0	8	1	0.0824742

## Sheet: Facebook and Fields
		Fields
		Food industry						Health organisation						Lifestyle personal						Nutrition professional
		Core vs NonCore Foods						Core vs NonCore Foods						Core vs NonCore Foods						Core vs NonCore Foods
		Core			NonCore			Core			NonCore			Core			NonCore			Core			NonCore
		Count	Row Total N %	Column Total N %	Count	Row Total N %	Column Total N %	Count	Row Total N %	Column Total N %	Count	Row Total N %	Column Total N %	Count	Row Total N %	Column Total N %	Count	Row Total N %	Column Total N %	Count	Row Total N %	Column Total N %	Count	Row Total N %	Column Total N %
Season	Summer	2	0.0377358	0.666667	51	0.962264	0.614458	7	0.7	0.388889	3	0.3	0.5	5	0.357143	0.277778	9	0.642857	0.36	23	0.793103	0.511111	6	0.206897	0.5
	Winter	1	0.030303	0.333333	32	0.969697	0.385542	11	0.785714	0.611111	3	0.214286	0.5	13	0.448276	0.722222	16	0.551724	0.64	22	0.785714	0.488889	6	0.214286	0.5
Format	Photo, photo with text, shared photo	2	0.0434783	0.666667	44	0.956522	0.53012	12	0.923077	0.666667	1	0.0769231	0.166667	3	0.375	0.166667	5	0.625	0.2	23	0.71875	0.511111	9	0.28125	0.75
	Video, video with text, shared video	1	0.025641	0.333333	38	0.974359	0.457831	3	1	0.166667	0	0	0	15	0.428571	0.833333	20	0.571429	0.8	3	0.6	0.0666667	2	0.4	0.166667
	Text only	0	0	0	1	1	0.0120482	3	0.375	0.166667	5	0.625	0.833333	0	0	0	0	0	0	19	0.95	0.422222	1	0.05	0.0833333
Origin of post	Original	3	0.0348837	1	83	0.965116	1	14	0.7	0.777778	6	0.3	1	17	0.404762	0.944444	25	0.595238	1	39	0.829787	0.866667	8	0.170213	0.666667
	Shared	0	0	0	0	0	0	4	1	0.222222	0	0	0	1	1	0.0555556	0	0	0	6	0.6	0.133333	4	0.4	0.333333
Hashtags	No	3	0.04	1	72	0.96	0.86747	5	0.5	0.277778	5	0.5	0.833333	15	0.375	0.833333	25	0.625	1	37	0.787234	0.822222	10	0.212766	0.833333
	Yes	0	0	0	11	1	0.13253	13	0.928571	0.722222	1	0.0714286	0.166667	3	1	0.166667	0	0	0	8	0.8	0.177778	2	0.2	0.166667
Links to other social media channels	No	1	0.0147059	0.333333	67	0.985294	0.807229	6	0.857143	0.333333	1	0.142857	0.166667	8	0.5	0.444444	8	0.5	0.32	10	0.714286	0.222222	4	0.285714	0.333333
	Yes	2	0.111111	0.666667	16	0.888889	0.192771	12	0.705882	0.666667	5	0.294118	0.833333	10	0.37037	0.555556	17	0.62963	0.68	35	0.813953	0.777778	8	0.186047	0.666667
Links to health information	No	3	0.0348837	1	83	0.965116	1	16	0.8	0.888889	4	0.2	0.666667	18	0.418605	1	25	0.581395	1	36	0.765957	0.8	11	0.234043	0.916667
	Yes	0	0	0	0	0	0	2	0.5	0.111111	2	0.5	0.333333	0	0	0	0	0	0	9	0.9	0.2	1	0.1	0.0833333
Product promotion	No	1	0.0666667	0.333333	14	0.933333	0.168675	13	0.764706	0.722222	4	0.235294	0.666667	15	0.535714	0.833333	13	0.464286	0.52	36	0.8	0.8	9	0.2	0.75
	Yes	2	0.028169	0.666667	69	0.971831	0.831325	5	0.714286	0.277778	2	0.285714	0.333333	3	0.2	0.166667	12	0.8	0.48	9	0.75	0.2	3	0.25	0.25
Does the content of the post promote health	No	1	0.0119048	0.333333	83	0.988095	1	1	0.2	0.0555556	4	0.8	0.666667	1	0.04	0.0555556	24	0.96	0.96	1	0.0909091	0.0222222	10	0.909091	0.833333
	Yes	2	1	0.666667	0	0	0	17	0.894737	0.944444	2	0.105263	0.333333	17	0.944444	0.944444	1	0.0555556	0.04	44	0.956522	0.977778	2	0.0434783	0.166667
Prompting engagement	N/A	1	0.0434783	0.333333	22	0.956522	0.26506	5	0.833333	0.277778	1	0.166667	0.166667	10	0.4	0.555556	15	0.6	0.6	24	0.857143	0.533333	4	0.142857	0.333333
	Announcement	2	0.0571429	0.666667	33	0.942857	0.39759	6	0.75	0.333333	2	0.25	0.333333	2	0.222222	0.111111	7	0.777778	0.28	9	0.692308	0.2	4	0.307692	0.333333
	Requires a response	0	0	0	19	1	0.228916	4	0.571429	0.222222	3	0.428571	0.5	5	0.625	0.277778	3	0.375	0.12	11	0.846154	0.244444	2	0.153846	0.166667
	Requires an action	0	0	0	7	1	0.0843373	3	1	0.166667	0	0	0	1	1	0.0555556	0	0	0	1	0.333333	0.0222222	2	0.666667	0.166667
Relationship building	N/A	1	0.016129	0.333333	61	0.983871	0.73494	8	0.615385	0.444444	5	0.384615	0.833333	12	0.375	0.666667	20	0.625	0.8	27	0.9	0.6	3	0.1	0.25
	External content	1	0.111111	0.333333	8	0.888889	0.0963855	3	0.75	0.166667	1	0.25	0.166667	3	0.6	0.166667	2	0.4	0.08	10	0.625	0.222222	6	0.375	0.5
	Replies to audience	1	0.142857	0.333333	6	0.857143	0.0722892	3	1	0.166667	0	0	0	3	0.5	0.166667	3	0.5	0.12	6	0.75	0.133333	2	0.25	0.166667
	Competition	0	0	0	6	1	0.0722892	3	1	0.166667	0	0	0	0	0	0	0	0	0	0	0	0	1	1	0.0833333
	Event photo	0	0	0	0	0	0	1	1	0.0555556	0	0	0	0	0	0	0	0	0	2	1	0.0444444	0	0	0
Real-world-tie-ins	N/A	1	0.0163934	0.333333	60	0.983607	0.722892	8	0.888889	0.444444	1	0.111111	0.166667	12	0.461538	0.666667	14	0.538462	0.56	32	0.8	0.711111	8	0.2	0.666667
	Yes	2	0.0833333	0.666667	22	0.916667	0.26506	10	0.666667	0.555556	5	0.333333	0.833333	6	0.352941	0.333333	11	0.647059	0.44	13	0.764706	0.288889	4	0.235294	0.333333
Encouragement to eat	N/A	0	0	0	2	1	0.0240964	1	0.333333	0.0555556	2	0.666667	0.333333	0	0	0	1	1	0.04	2	0.4	0.0444444	3	0.6	0.25
	Encouragement to eat, general	1	0.027027	0.333333	36	0.972973	0.433735	9	0.75	0.5	3	0.25	0.5	14	0.388889	0.777778	22	0.611111	0.88	30	0.833333	0.666667	6	0.166667	0.5
	Encouragement to eat, specific	0	0	0	16	1	0.192771	1	1	0.0555556	0	0	0	2	0.666667	0.111111	1	0.333333	0.04	1	0.5	0.0222222	1	0.5	0.0833333
	Food shown	2	0.0645161	0.666667	29	0.935484	0.349398	7	0.875	0.388889	1	0.125	0.166667	2	0.666667	0.111111	1	0.333333	0.04	12	0.857143	0.266667	2	0.142857	0.166667
Encouragement to exercise	No	3	0.0348837	1	83	0.965116	1	18	0.75	1	6	0.25	1	18	0.418605	1	25	0.581395	1	41	0.773585	0.911111	12	0.226415	1
	Yes	0	0	0	0	0	0	0	0	0	0	0	0	0	0	0	0	0	0	4	1	0.0888889	0	0	0
Emotion Inducing	Positive	2	0.025641	0.666667	76	0.974359	0.915663	15	0.833333	0.833333	3	0.166667	0.5	18	0.45	1	22	0.55	0.88	36	0.782609	0.8	10	0.217391	0.833333
	Negative	0	0	0	0	0	0	2	0.5	0.111111	2	0.5	0.333333	0	0	0	3	1	0.12	5	0.714286	0.111111	2	0.285714	0.166667
Association with success	No	3	0.0348837	1	83	0.965116	1	16	0.727273	0.888889	6	0.272727	1	17	0.404762	0.944444	25	0.595238	1	38	0.77551	0.844444	11	0.22449	0.916667
	Yes	0	0	0	0	0	0	2	1	0.111111	0	0	0	1	1	0.0555556	0	0	0	7	0.875	0.155556	1	0.125	0.0833333
Tone	-9.00 (missing)	0	0	0	1	1	0.0120482	0	0	0	0	0	0	0	0	0	0	0	0	0	0	0	0	0	0
	Positive	2	0.025641	0.666667	76	0.974359	0.915663	9	0.692308	0.5	4	0.307692	0.666667	15	0.394737	0.833333	23	0.605263	0.92	11	0.52381	0.244444	10	0.47619	0.833333
	Neutral	1	0.142857	0.333333	6	0.857143	0.0722892	9	0.818182	0.5	2	0.181818	0.333333	3	0.6	0.166667	2	0.4	0.08	34	0.971429	0.755556	1	0.0285714	0.0833333
	Negative	0	0	0	0	0	0	0	0	0	0	0	0	0	0	0	0	0	0	0	0	0	1	1	0.0833333
Social Media Strategy Used	Visually appealing	0	0	0	24	1	0.289157	4	0.666667	0.222222	2	0.333333	0.333333	11	0.37931	0.611111	18	0.62069	0.72	13	0.764706	0.288889	4	0.235294	0.333333
	Statistics/facts	0	0	0	0	0	0	4	0.666667	0.222222	2	0.333333	0.333333	0	0	0	1	1	0.04	8	0.888889	0.177778	1	0.111111	0.0833333
	Relates to a product	2	0.0434783	0.666667	44	0.956522	0.53012	5	0.833333	0.277778	1	0.166667	0.166667	1	0.5	0.0555556	1	0.5	0.04	4	0.8	0.0888889	1	0.2	0.0833333
	Relatable content	1	0.111111	0.333333	8	0.888889	0.0963855	5	0.833333	0.277778	1	0.166667	0.166667	6	0.545455	0.333333	5	0.454545	0.2	19	0.904762	0.422222	2	0.0952381	0.166667
	Humourous	0	0	0	7	1	0.0843373	0	0	0	0	0	0	0	0	0	0	0	0	1	0.2	0.0222222	4	0.8	0.333333

## Sheet: Instargam and Fields
		Fields
		Food industry						Health organisation						Lifestyle personal						Nutrition professional
		Core vs NonCore Foods						Core vs NonCore Foods						Core vs NonCore Foods						Core vs NonCore Foods
		Core			NonCore			Core			NonCore			Core			NonCore			Core			NonCore
		Count	Row Total N %	Column Total N %	Count	Row Total N %	Column Total N %	Count	Row Total N %	Column Total N %	Count	Row Total N %	Column Total N %	Count	Row Total N %	Column Total N %	Count	Row Total N %	Column Total N %	Count	Row Total N %	Column Total N %	Count	Row Total N %	Column Total N %
Season	Summer	5	0.147059	0.833333	29	0.852941	0.460317	6	0.857143	0.3	1	0.142857	1	10	0.5	0.434783	10	0.5	0.384615	26	0.83871	0.722222	5	0.16129	0.714286
	Winter	1	0.0285714	0.166667	34	0.971429	0.539683	14	1	0.7	0	0	0	13	0.448276	0.565217	16	0.551724	0.615385	10	0.833333	0.277778	2	0.166667	0.285714
Format	Photo, photo with text, shared photo	6	0.105263	1	51	0.894737	0.809524	19	0.95	0.95	1	0.05	1	13	0.65	0.565217	7	0.35	0.269231	33	0.825	0.916667	7	0.175	1
	Video, video with text, shared video	0	0	0	12	1	0.190476	1	1	0.05	0	0	0	10	0.344828	0.434783	19	0.655172	0.730769	3	1	0.0833333	0	0	0
Origin of post	Original	2	0.04	0.333333	48	0.96	0.761905	16	0.941176	0.8	1	0.0588235	1	20	0.454545	0.869565	24	0.545455	0.923077	31	0.815789	0.861111	7	0.184211	1
	Shared	4	0.210526	0.666667	15	0.789474	0.238095	4	1	0.2	0	0	0	3	0.6	0.130435	2	0.4	0.0769231	5	1	0.138889	0	0	0
Hashtags	No	5	0.2	0.833333	20	0.8	0.31746	4	1	0.2	0	0	0	18	0.473684	0.782609	20	0.526316	0.769231	13	0.8125	0.361111	3	0.1875	0.428571
	Yes	1	0.0227273	0.166667	43	0.977273	0.68254	16	0.941176	0.8	1	0.0588235	1	5	0.454545	0.217391	6	0.545455	0.230769	23	0.851852	0.638889	4	0.148148	0.571429
Links to other social media channels	No	1	0.0222222	0.166667	44	0.977778	0.698413	12	0.923077	0.6	1	0.0769231	1	19	0.513514	0.826087	18	0.486486	0.692308	18	0.857143	0.5	3	0.142857	0.428571
	Yes	5	0.208333	0.833333	19	0.791667	0.301587	8	1	0.4	0	0	0	4	0.333333	0.173913	8	0.666667	0.307692	18	0.818182	0.5	4	0.181818	0.571429
Links to health information	No	6	0.0869565	1	63	0.913043	1	20	0.952381	1	1	0.047619	1	23	0.469388	1	26	0.530612	1	36	0.837209	1	7	0.162791	1
	Yes	0	0	0	0	0	0	0	0	0	0	0	0	0	0	0	0	0	0	0	0	0	0	0	0
Product promotion	No	3	0.136364	0.5	19	0.863636	0.301587	19	0.95	0.95	1	0.05	1	20	0.465116	0.869565	23	0.534884	0.884615	30	0.810811	0.833333	7	0.189189	1
	Yes	3	0.0638298	0.5	44	0.93617	0.698413	1	1	0.05	0	0	0	3	0.5	0.130435	3	0.5	0.115385	6	1	0.166667	0	0	0
Does the content of the post promote health	No	2	0.0307692	0.333333	63	0.969231	1	1	0.5	0.05	1	0.5	1	1	0.0384615	0.0434783	25	0.961538	0.961538	3	0.375	0.0833333	5	0.625	0.714286
	Yes	4	1	0.666667	0	0	0	19	1	0.95	0	0	0	22	0.956522	0.956522	1	0.0434783	0.0384615	33	0.942857	0.916667	2	0.0571429	0.285714
Prompting engagement	N/A	3	0.125	0.5	21	0.875	0.333333	6	1	0.3	0	0	0	12	0.428571	0.521739	16	0.571429	0.615385	13	0.866667	0.361111	2	0.133333	0.285714
	Announcement	1	0.0454545	0.166667	21	0.954545	0.333333	7	0.875	0.35	1	0.125	1	6	0.666667	0.26087	3	0.333333	0.115385	11	0.785714	0.305556	3	0.214286	0.428571
	Requires a response	2	0.111111	0.333333	16	0.888889	0.253968	7	1	0.35	0	0	0	5	0.5	0.217391	5	0.5	0.192308	12	0.857143	0.333333	2	0.142857	0.285714
	Requires an action	0	0	0	5	1	0.0793651	0	0	0	0	0	0	0	0	0	2	1	0.0769231	0	0	0	0	0	0
Relationship building	N/A	0	0	0	40	1	0.634921	9	1	0.45	0	0	0	17	0.515152	0.73913	16	0.484848	0.615385	20	0.869565	0.555556	3	0.130435	0.428571
	External content	5	0.25	0.833333	15	0.75	0.238095	4	1	0.2	0	0	0	3	0.272727	0.130435	8	0.727273	0.307692	6	1	0.166667	0	0	0
	Replies to audience	0	0	0	5	1	0.0793651	4	0.8	0.2	1	0.2	1	3	0.6	0.130435	2	0.4	0.0769231	8	0.727273	0.222222	3	0.272727	0.428571
	Competition	0	0	0	3	1	0.047619	1	1	0.05	0	0	0	0	0	0	0	0	0	1	1	0.0277778	0	0	0
	Event photo	1	1	0.166667	0	0	0	2	1	0.1	0	0	0	0	0	0	0	0	0	1	0.5	0.0277778	1	0.5	0.142857
Real-world-tie-ins	N/A	2	0.0465116	0.333333	41	0.953488	0.650794	11	1	0.55	0	0	0	17	0.5	0.73913	17	0.5	0.653846	18	0.818182	0.5	4	0.181818	0.571429
	Yes	4	0.153846	0.666667	22	0.846154	0.349206	9	0.9	0.45	1	0.1	1	6	0.4	0.26087	9	0.6	0.346154	18	0.857143	0.5	3	0.142857	0.428571
Encouragement to eat	N/A	0	0	0	2	1	0.031746	0	0	0	0	0	0	1	1	0.0434783	0	0	0	1	1	0.0277778	0	0	0
	Encouragement to eat, general	1	0.0384615	0.166667	25	0.961538	0.396825	15	1	0.75	0	0	0	15	0.454545	0.652174	18	0.545455	0.692308	24	0.827586	0.666667	5	0.172414	0.714286
	Encouragement to eat, specific	3	0.214286	0.5	11	0.785714	0.174603	2	0.666667	0.1	1	0.333333	1	1	0.25	0.0434783	3	0.75	0.115385	2	0.666667	0.0555556	1	0.333333	0.142857
	Food shown	2	0.0740741	0.333333	25	0.925926	0.396825	3	1	0.15	0	0	0	6	0.545455	0.26087	5	0.454545	0.192308	9	0.9	0.25	1	0.1	0.142857
Encouragement to exercise	No	6	0.0869565	1	63	0.913043	1	20	0.952381	1	1	0.047619	1	23	0.479167	1	25	0.520833	0.961538	34	0.829268	0.944444	7	0.170732	1
	Yes	0	0	0	0	0	0	0	0	0	0	0	0	0	0	0	1	1	0.0384615	2	1	0.0555556	0	0	0
Emotion Inducing	Positive	5	0.0769231	0.833333	60	0.923077	0.952381	18	0.947368	0.9	1	0.0526316	1	22	0.458333	0.956522	26	0.541667	1	32	0.820513	0.888889	7	0.179487	1
	Negative	0	0	0	0	0	0	1	1	0.05	0	0	0	0	0	0	0	0	0	1	1	0.0277778	0	0	0
Association with success	No	6	0.0869565	1	63	0.913043	1	16	0.941176	0.8	1	0.0588235	1	21	0.446809	0.913043	26	0.553191	1	30	0.833333	0.833333	6	0.166667	0.857143
	Yes	0	0	0	0	0	0	4	1	0.2	0	0	0	2	1	0.0869565	0	0	0	6	0.857143	0.166667	1	0.142857	0.142857
Tone	-9.00 (missing)	0	0	0	0	0	0	0	0	0	0	0	0	0	0	0	0	0	0	0	0	0	0	0	0
	Positive	6	0.0923077	1	59	0.907692	0.936508	13	0.928571	0.65	1	0.0714286	1	16	0.390244	0.695652	25	0.609756	0.961538	25	0.862069	0.694444	4	0.137931	0.571429
	Neutral	0	0	0	4	1	0.0634921	7	1	0.35	0	0	0	7	0.875	0.304348	1	0.125	0.0384615	10	0.769231	0.277778	3	0.230769	0.428571
	Negative	0	0	0	0	0	0	0	0	0	0	0	0	0	0	0	0	0	0	1	1	0.0277778	0	0	0
Social Media Strategy Used	Visually appealing	5	0.151515	0.833333	28	0.848485	0.444444	15	0.9375	0.75	1	0.0625	1	10	0.344828	0.434783	19	0.655172	0.730769	19	0.863636	0.527778	3	0.136364	0.428571
	Statistics/facts	0	0	0	0	0	0	1	1	0.05	0	0	0	1	0.5	0.0434783	1	0.5	0.0384615	4	1	0.111111	0	0	0
	Relates to a product	1	0.0416667	0.166667	23	0.958333	0.365079	1	1	0.05	0	0	0	1	0.5	0.0434783	1	0.5	0.0384615	1	1	0.0277778	0	0	0
	Relatable content	0	0	0	6	1	0.0952381	3	1	0.15	0	0	0	11	0.785714	0.478261	3	0.214286	0.115385	12	0.75	0.333333	4	0.25	0.571429
	Humourous	0	0	0	6	1	0.0952381	0	0	0	0	0	0	0	0	0	2	1	0.0769231	0	0	0	0	0	0
